# Supplementary material for: Multivariate analysis applied to complex biological medicines
Source: Royal Society of Chemistry journal article supplement (doi:10.1039/c9fd00009g), 2019-01-01
Supplement: c9fd00009g1.pdf [file c9fd00009g1.pdf]

## Supplementary Information

### Multivariate analysis applied to complex biological medicines

Timothy R. Rudd\* <sup>a,b</sup>, Lucio Mauri\* <sup>c</sup>, Maria Marinozzi <sup>c</sup>, Eduardo Stancanelli <sup>c</sup>, Edwin A. Yates <sup>b</sup>, Annamaria Naggi <sup>c</sup> and Marco Guerrini <sup>c</sup>

<sup>a</sup>National Institute for Biological Standards and Control (NIBSC), Blanche Lane, South Mimms, Potters Bar, Hertfordshire, EN6 3QG, UK

<sup>b</sup>Department of Biochemistry, Biosciences Building, University of Liverpool, Crown Street, Liverpool, L69 7ZB, UK

<sup>c</sup>Istituto di Ricerche Chimiche e Biochimiche 'G. Ronzoni', Via G. Colombo 81, 20133 Milano, Italia

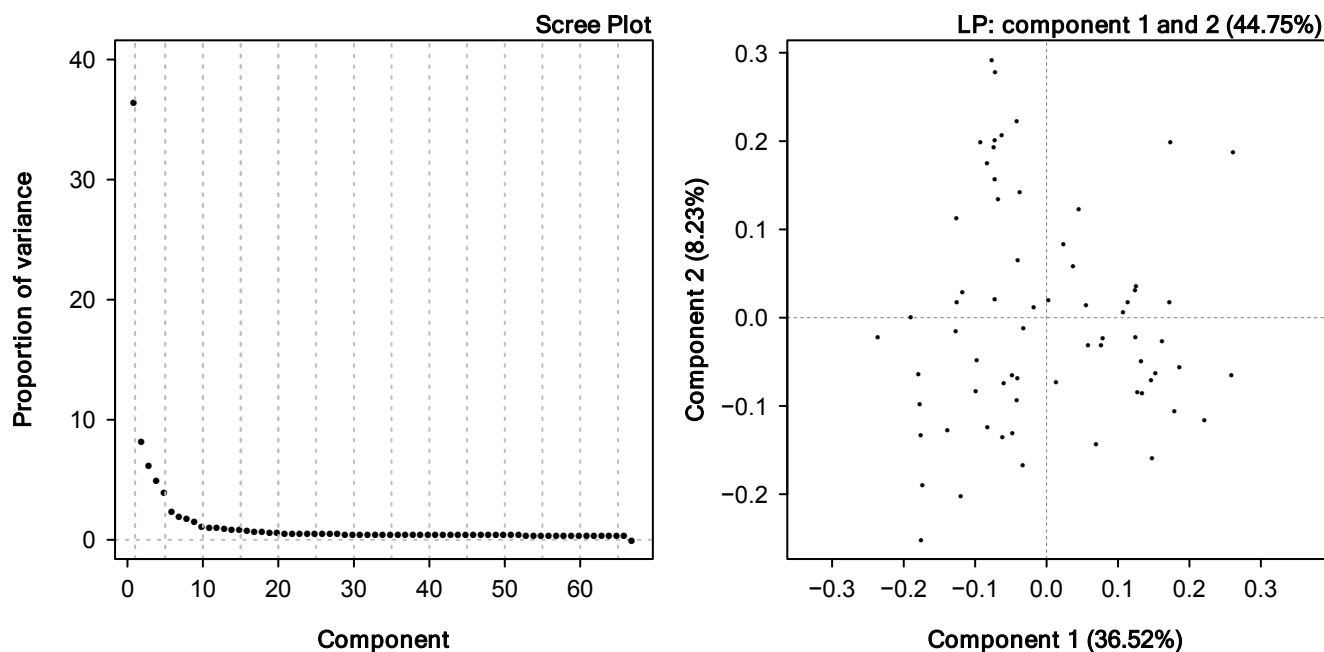

**Supplementary Figure 1.** Scree (Left) and Loading (Right) Plots for the PCA of PMH HSQC NMR spectra.

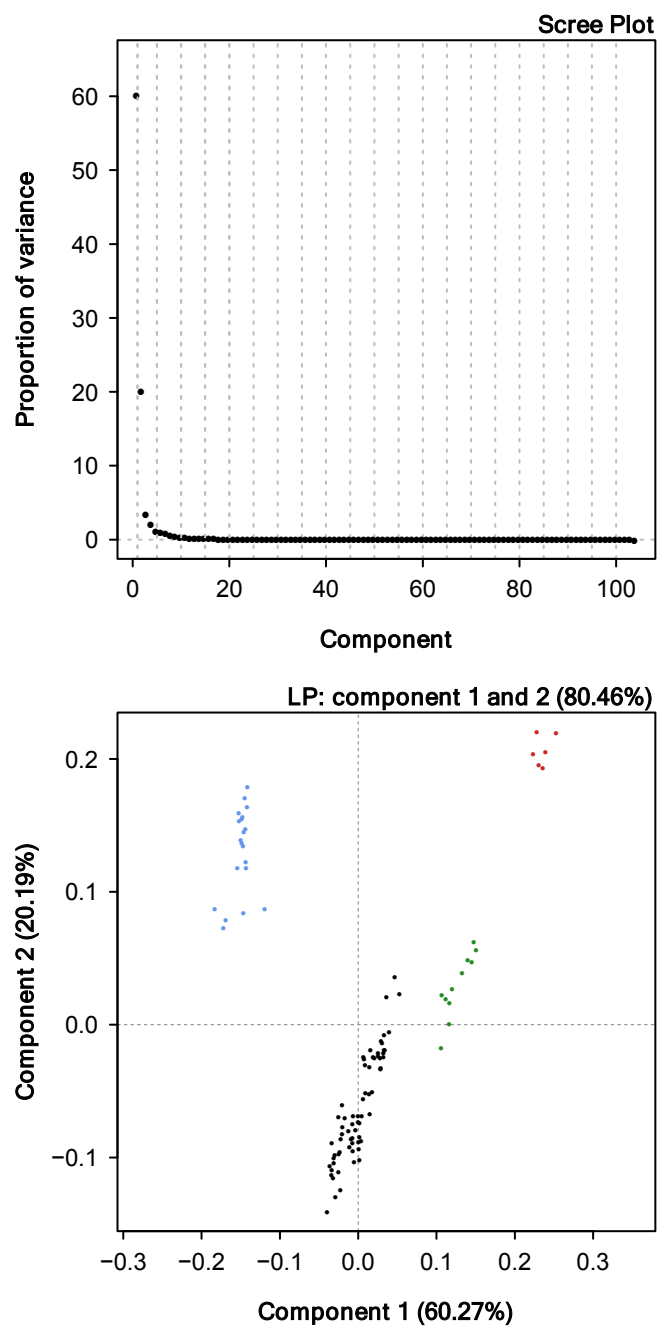

**Supplementary Figure 2.** Scree (Top) and Loading (Bottom) Plots for the PCA of PMH (black), BMH (light blue), OMH (green) and BLH (red) HSQC NMR spectra.

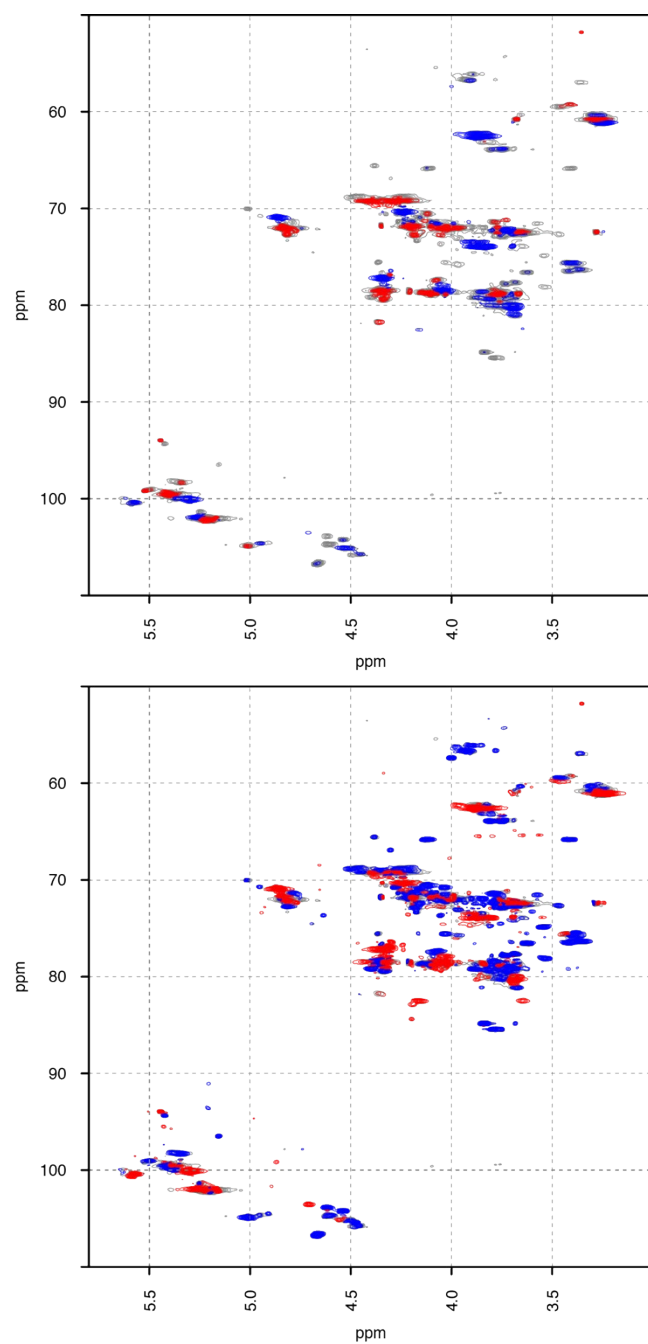

**Supplementary Figure 3.** Score Plots for the PCA of PMH, BMH, OMH and BLH HSQC NMR spectra. Component 1 (top) and Component 2 (bottom).
